# Supplementary material for: Recurrent intragenic rearrangements of EGFR and BRAF in soft tissue tumors of infants
Source: PubMed Central journal article supplement (PMC6006309; doi:10.1038/s41467-018-04650-6), 2018-06-18
Supplement: 41467_2018_4650_MOESM1_ESM.pdf [file 41467_2018_4650_MOESM1_ESM.pdf]

## Supplementary Information

Recurrent intragenic rearrangements of *EGFR* and *BRAF* in soft tissue tumors of infants

Wegert *et al.*

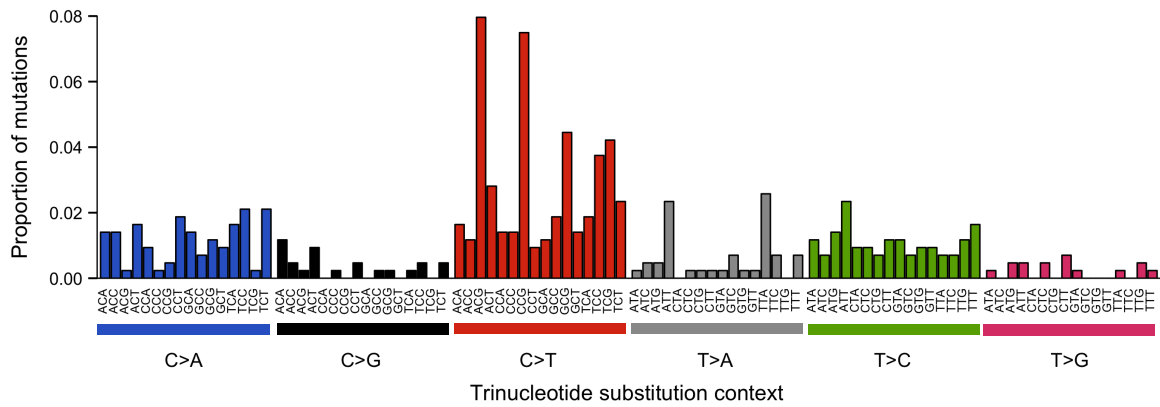

**Supplementary Figure 1 | Trinucleotide context of substitution mutations in 10 classical congenital mesoblastic nephroma genomes.** The x-axis indicates the 96 classes of substitution according to trinucleotide context; proportion of substitution mutations in each class is shown on the y-axis.

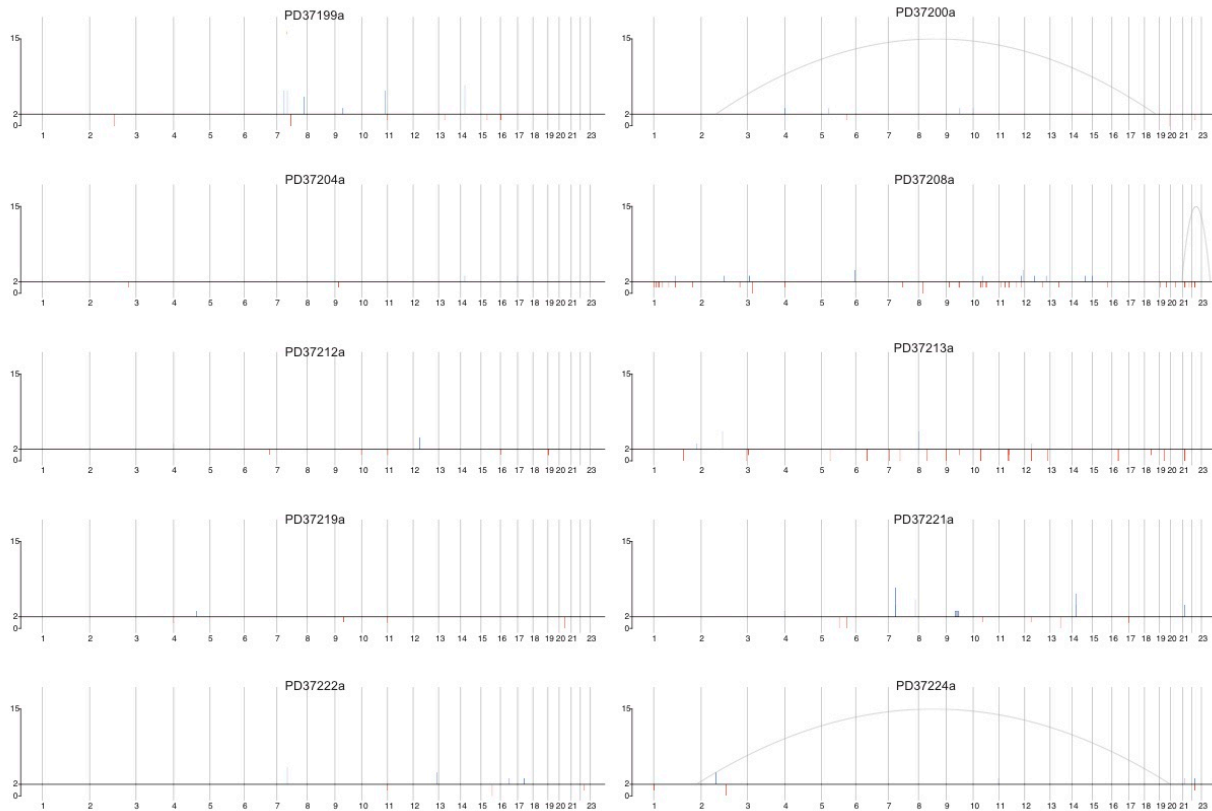

**Supplementary Figure 2 | Structural changes in 10 congenital mesoblastic nephroma genomes.** Copy number profile and rearrangements are shown for 10 classical histology CMN lacking the canonical *ETV6-NTRK3* fusion. Absolute copy number is represented on the y-axis; chromosomes are indicated on the x-axis. Blue and red horizontal segments represent copy number gains and losses, respectively. Grey lines indicate start and end of translocations.

**Supplementary Table 1 | Primer sequences**

| <b>Target</b>               | <b>Primer name</b>          | <b>Sequence</b>             |
|-----------------------------|-----------------------------|-----------------------------|
| <b>EGFR-ITD</b>             | hEGFR-ITD1 <sup>1,3</sup>   | CGACGAGTACCTCATCCCAC        |
|                             | hEGFR-D2 <sup>1</sup>       | AGCTTGGTTGGGAGCTTCTC        |
|                             | hEGFR-D3 <sup>1,2</sup>     | GCTGTATCGCTGCAAGAAGC        |
|                             | hEGFR-D1 <sup>2,3</sup>     | CGAGTACCTCATCCCACAGC        |
|                             | hEGFR-ITD2 <sup>2</sup>     | CTGGGTGTAAGAGGCTCCAC        |
| <b>BRAF-ID</b>              | BRAF-c1 <sup>1,3</sup>      | GTGGGGAGCATAATCCACCA        |
|                             | BRAF-c2 <sup>1</sup>        | GGGCCTCTATATGTTCTGTGT       |
|                             | BRAF-c4 <sup>1</sup>        | GTTGATCCTCCATCACCACGA       |
|                             | BRAF-c5 <sup>1,2</sup>      | TCAGTTCCGTTCCCCAGAGA        |
|                             | BRAF-c1b <sup>2,3</sup>     | GGGAGCATAATCCACCATCAATATATC |
|                             | BRAF-c4b <sup>2</sup>       | ACCACGAAATCCTTGGTCTCTAAT    |
| <b>KIAA1549-BRAF fusion</b> | KIAA1549-e15 <sup>1</sup>   | CTCAGCCTACATCGGATGCC        |
|                             | KIAA1549-e16 <sup>1</sup>   | AGACGGCCAACAATCCCTG         |
|                             | BRAF-e9 <sup>1</sup>        | GGGGGTAGCAGACAAACCTG        |
|                             | BRAF-e11 <sup>1</sup>       | CTGCCCATCAGGAATCTCCC        |
|                             | KIAA1549-contr <sup>1</sup> | AGTAGATCCCTCTGGCAGCA        |
| <b>LMNA-NTRK1</b>           | LMNA-e2 <sup>1</sup>        | TCTCAGTGAGAAGCGCACGC        |
|                             | NTRK1-e13 <sup>1</sup>      | GATGTCCCGGCGCTTGATGT        |
|                             | LMNA-e7 <sup>1</sup>        | AGGAGGTGGATGAGGAGGGC        |
| <b>ETV6-NTRK3</b>           | ETV6-3 <sup>1,3</sup>       | TCATGGTCTCTGTCTCCCCG        |
|                             | NTRK3-2 <sup>1</sup>        | TCGCTTCAGCACGATGTCTC        |
|                             | ETV6-6 <sup>1,2</sup>       | CGGCTGTGAGAAAGCAACTG        |
|                             | ETV6-5 <sup>2</sup>         | GCCTGAAGAGCACGCCAT          |
|                             | NTRK3-3 <sup>2</sup>        | TCTCTCTCTTAATGTGCTGCA       |

<sup>1</sup> used for RT-PCR

<sup>2</sup> used for subsequent nested RT-PCR of FFPE derived RNA

<sup>3</sup> used for sequencing
