# Supplementary material for: Recurrent intragenic rearrangements of EGFR and BRAF in soft tissue tumors of infants
Source: PubMed Central journal article supplement (PMC6006309; doi:10.1038/s41467-018-04650-6), 2018-06-18
Supplement: 41467_2018_4650_MOESM3_ESM.pdf [file 41467_2018_4650_MOESM3_ESM.pdf]

## **Description of Supplementary Data Files**

### **File Name: Supplementary Data 1**

**Description:** List of all discovery and validation cohort tumor samples summarizing clinical information, sequencing assays performed and oncogenic rearrangements identified.

### **File Name: Supplementary Data 2**

**Description:** Somatic point mutations identified by whole genome sequencing in the discovery cohort comprising 10 primary classical CMN tumors.

### **File Name: Supplementary Data 3**

**Description:** Details of each oncogenic gene fusion detected in 17 CMN interrogated by whole genome sequencing (discovery and extension cohort).
